# Supplementary material for: The effect of gum consumption on blood pressure as a risk factor for coronary heart disease: A meta-analysis of controlled trials
Source: Atypon-hosted journal article supplement (doi:10.1024/0300-9831/a000696), 2021-01-21

## Supplemental figure 1.

### A) Health status

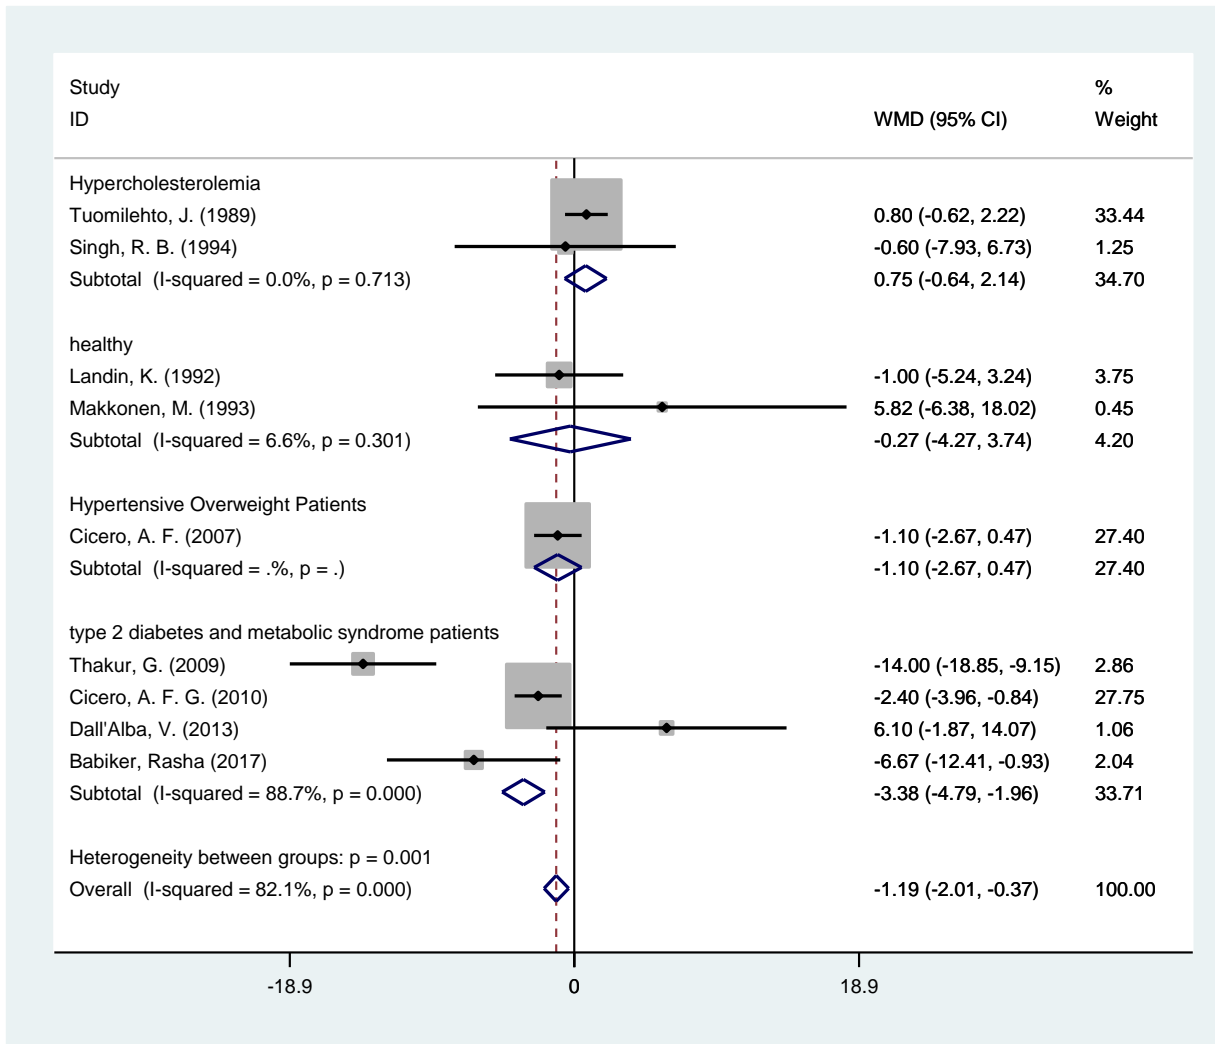

## B) Intervention duration (weeks)

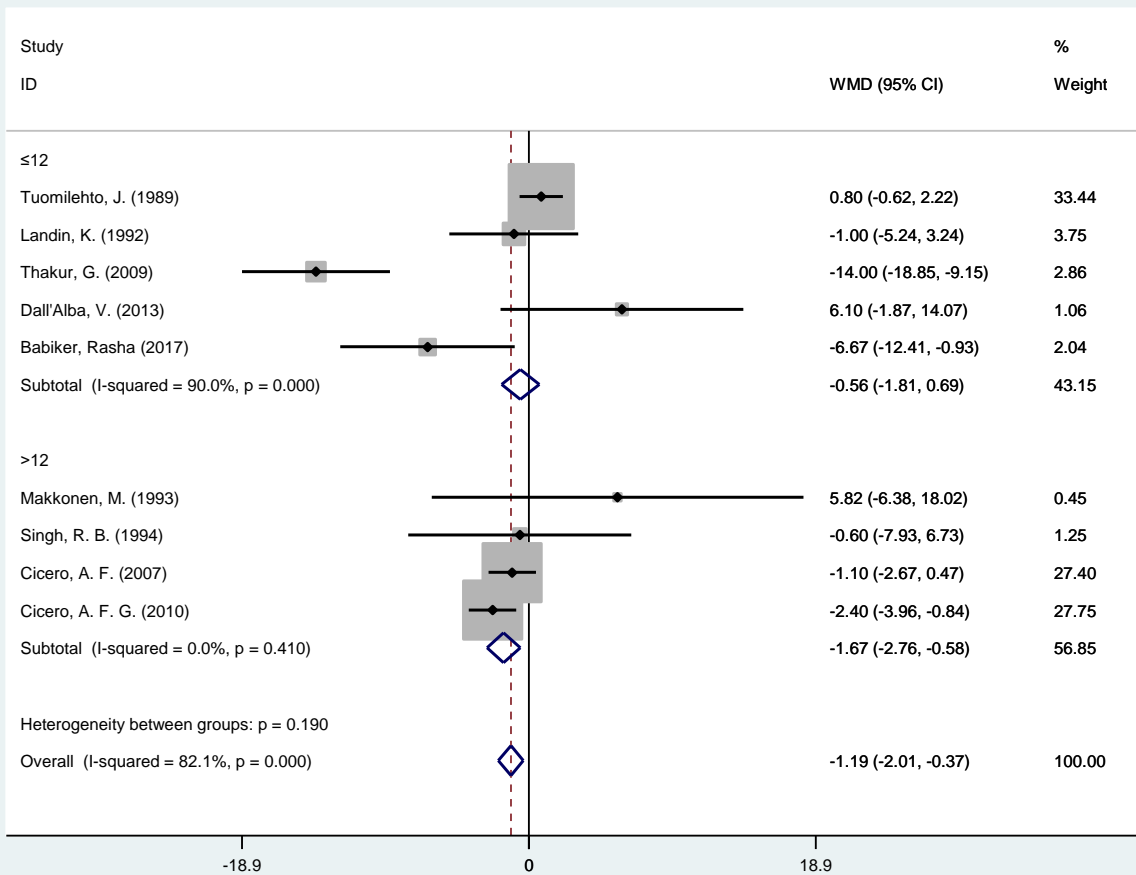

### C) Dosage (g/day)

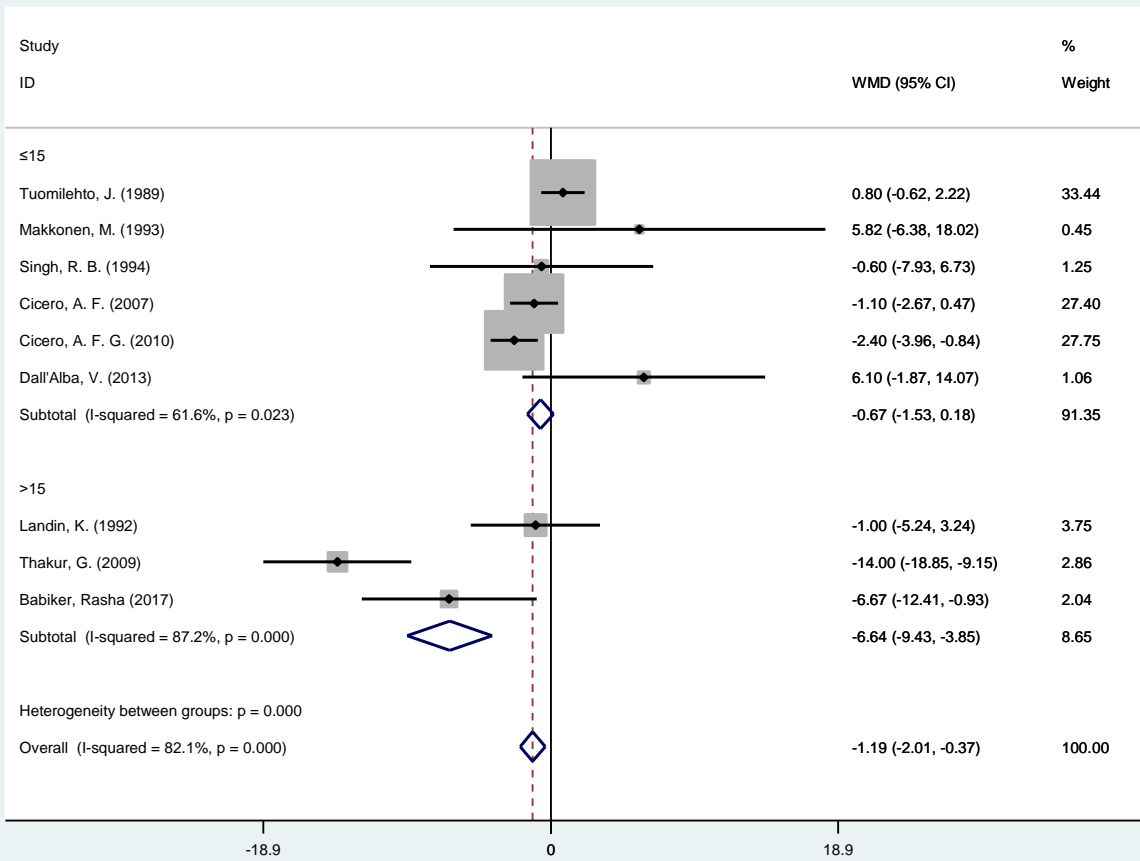

## Supplemental figure 2.

### A) Health status

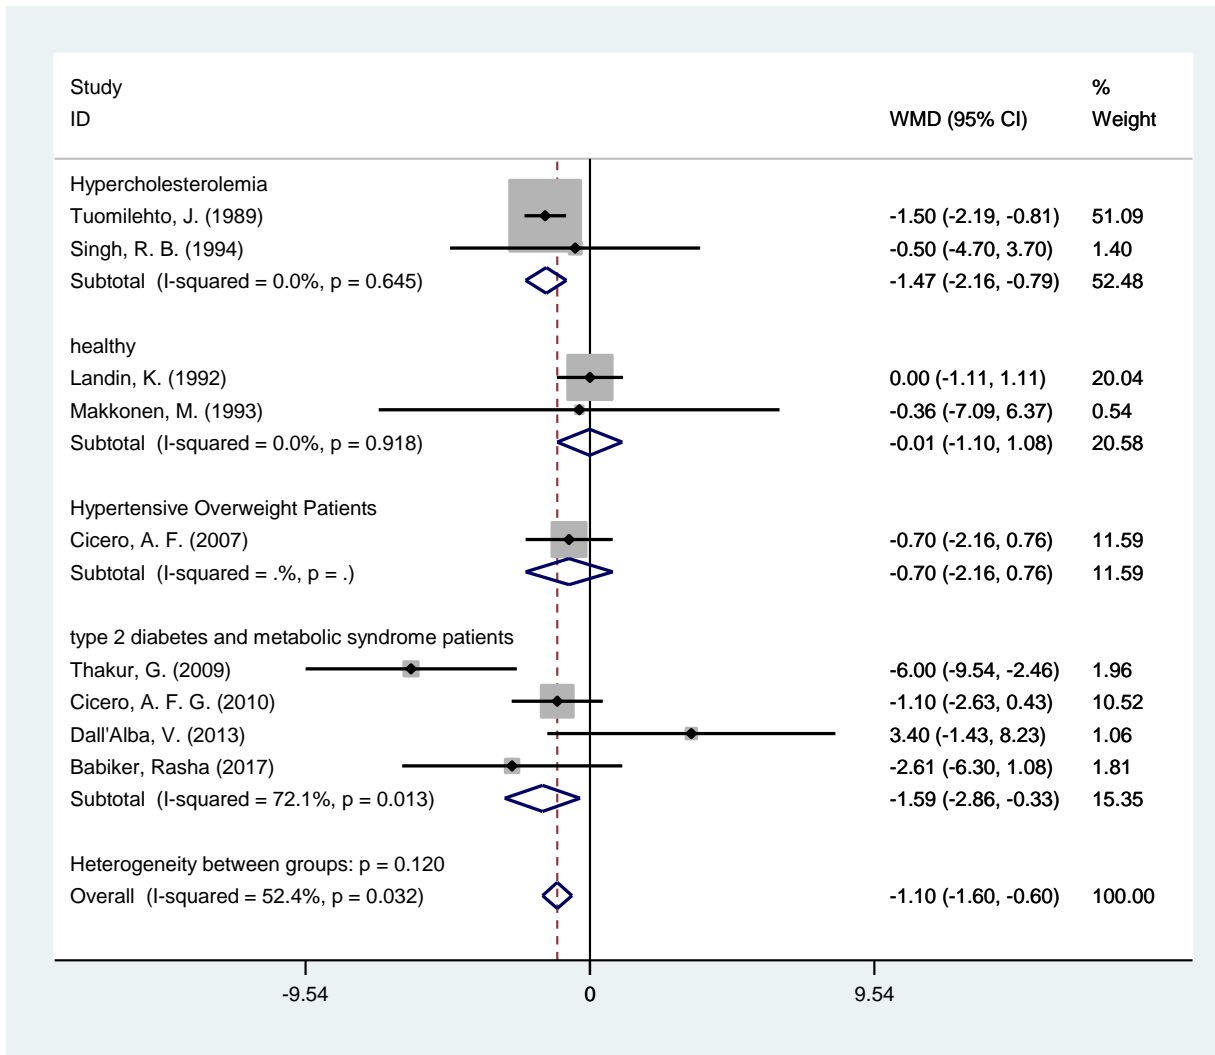

## B) Intervention duration (weeks)

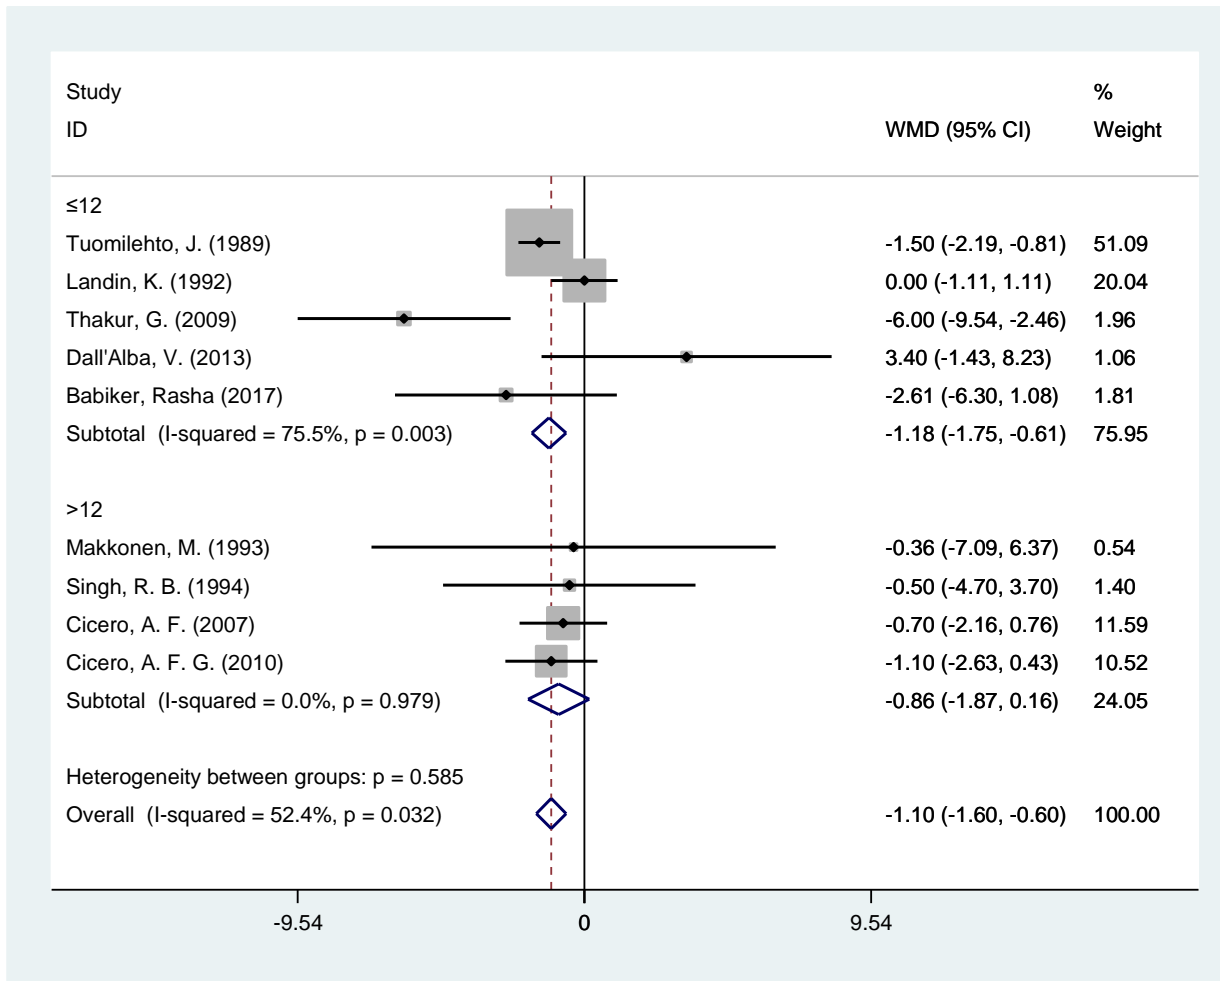

### C) Dosage (g/day)

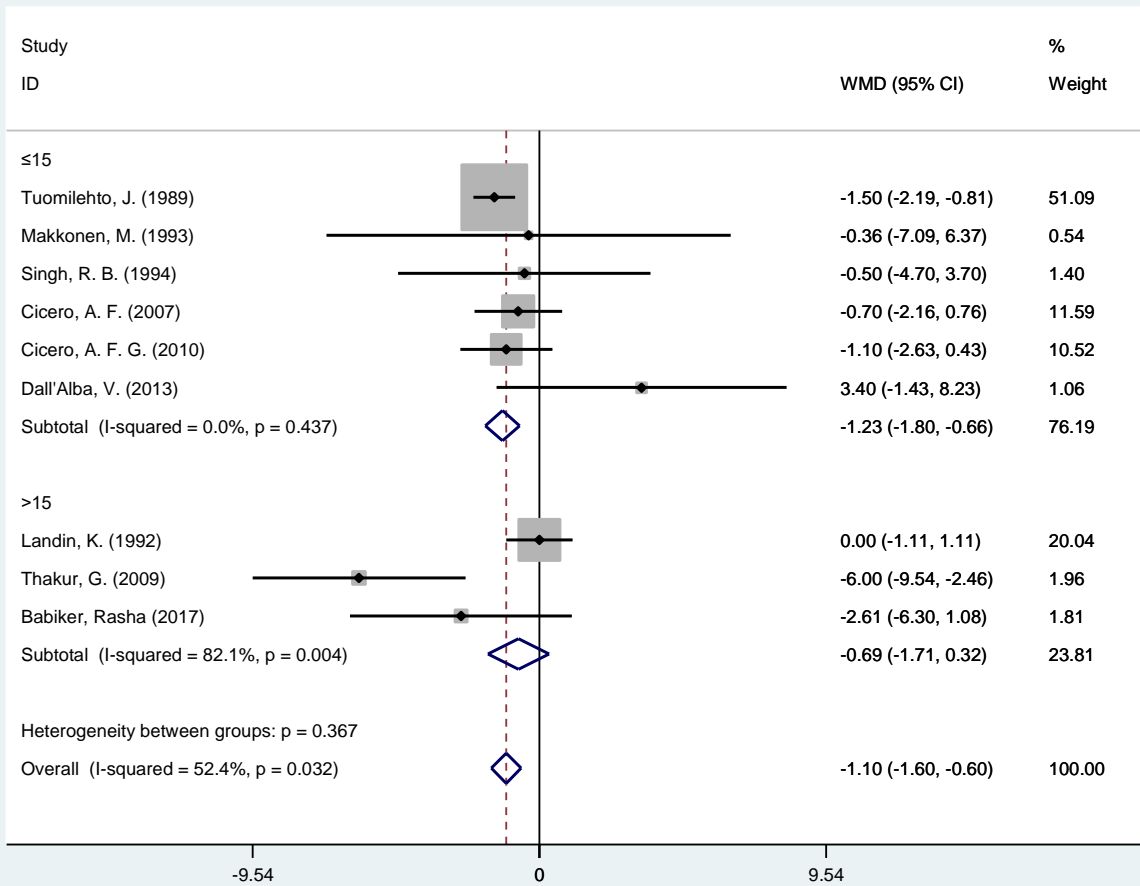

**Supplemental Figure 3.** Results of an influence analysis in which the meta-analysis of systolic blood pressure (SBP) is re-estimated omitting each study in turn.

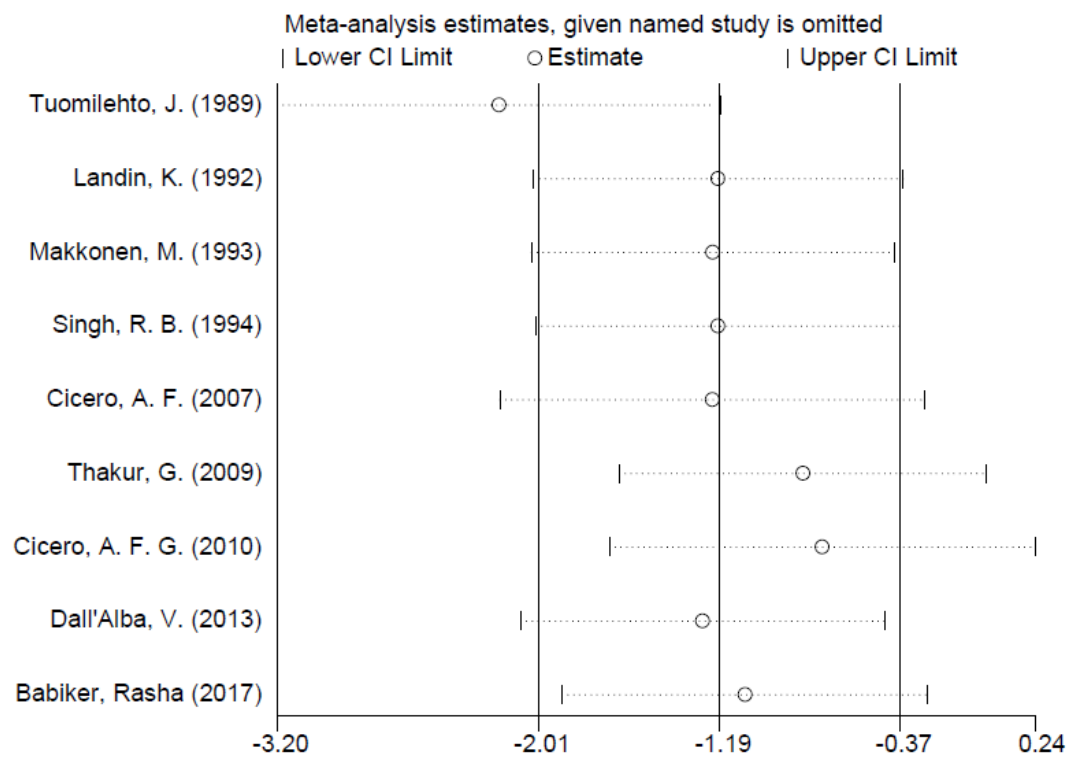

**Supplemental Figure 3.** Results of an influence analysis in which the meta-analysis of diastolic blood pressure (DBP) is re-estimated omitting each study in turn.

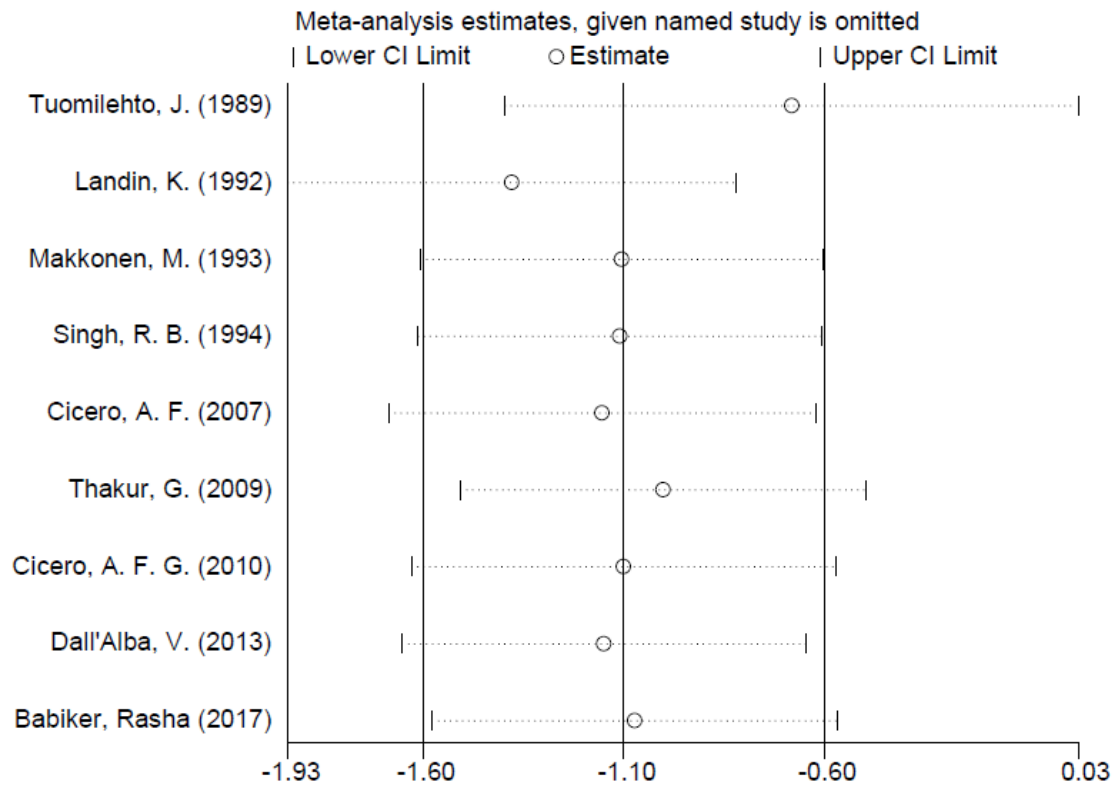

Supplement: 0300-9831_a000696_esm1.pdf [file 0300-9831_a000696_esm1.pdf]
